# Supplementary material for: Hydrogen peroxide production from oxygen and formic acid by homogeneous Ir–Ni catalyst
Source: Royal Society of Chemistry journal article supplement (doi:10.1039/d1dt01431e), 2021-01-01
Supplement: d1dt01431e1.pdf [file d1dt01431e1.pdf]

## **Electronic Supplementary Information**

### **Hydrogen Peroxide Production from Oxygen and Formic Acid by Homogeneous Ir-Ni Catalyst**

Yoshihiro Shimoyama, Yuji Ohgomori, Yoshihiro Kon, and Dachao Hong\*

Interdisciplinary Research Center for Catalytic Chemistry, National Institute of Advanced Industrial  
Science and Technology (AIST), 1-1-1 Higashi, Tsukuba, Ibaraki 305-8565, Japan

\* To whom correspondence should be addressed.  
E-mail: hong-d@aist.go.jp (D. H.)

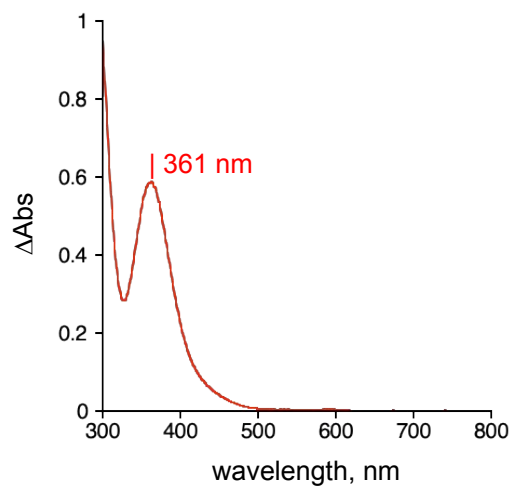

**Fig. S1** An absorption difference of UV-Vis spectra before and after the addition of reaction mixture (30  $\mu$ L) into MeCN (3.0 mL,  $[\text{HClO}_4] = 0.5 \text{ mM}$ ,  $[\text{NaI}] = 0.5 \text{ M}$ ) at RT. The reaction conditions:  $[\mathbf{1}] = 0.10 \text{ mM}$ ,  $[\text{HCOOH}] = 0.20 \text{ M}$ , solvent: ethylene glycol (1.0 mL), reaction time: 15 h, reaction temp.: 313 K, under air.

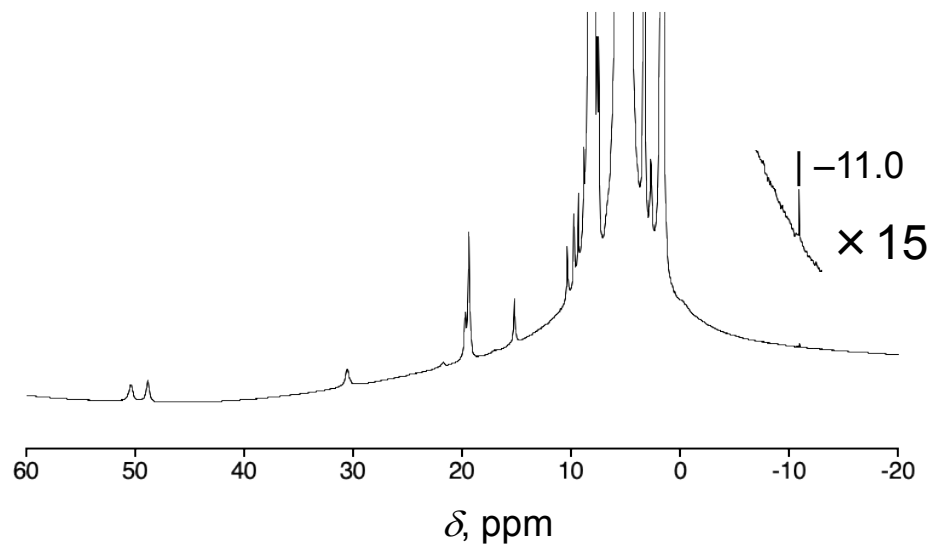

**Fig. S2**  $^1\text{H}$  NMR spectrum of **1** in methanol- $d_4$  in the presence of 0.80 M HCOOH at 298 K.

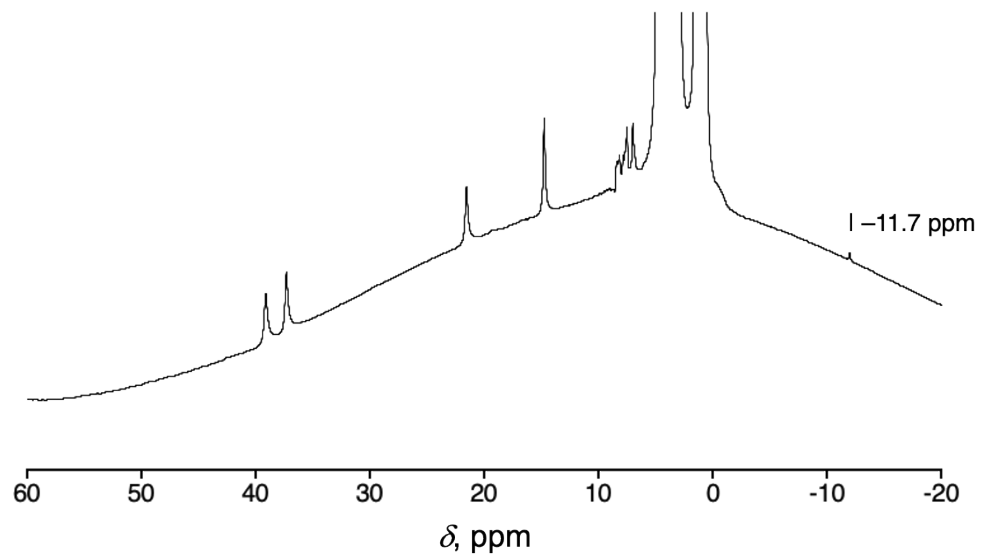

**Fig. S3**  $^1\text{H}$  NMR spectrum of **1** in methanol- $d_4$  in the presence of  $\text{NaBH}_4$  (3.0 mM) at 298 K.

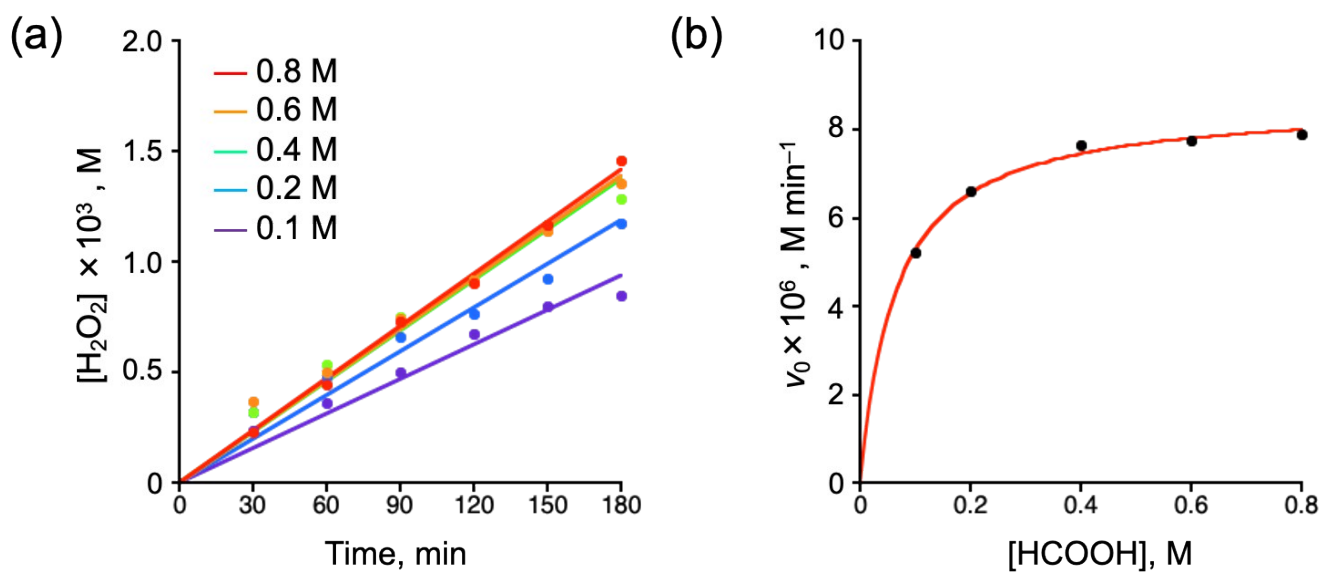

**Fig. S4** (a) Time profiles of the H<sub>2</sub>O<sub>2</sub> production by **1** at various HCOOH concentrations. (b) Michaelis-Menten analysis of the initial rates of H<sub>2</sub>O<sub>2</sub> production. Reaction conditions: [**1**] = 0.10 mM, [HCOOH] = 0.10 – 0.80 M, solvent: ethylene glycol (1.0 mL), temperature: 313 K, under air. The parameters ( $V_{\max}$ ,  $K_M$ ) were determined from the curve-fitting analysis based on the following equation.

$$v_0 = V_{\max}[\text{HCOOH}]/(K_M + [\text{HCOOH}]).$$

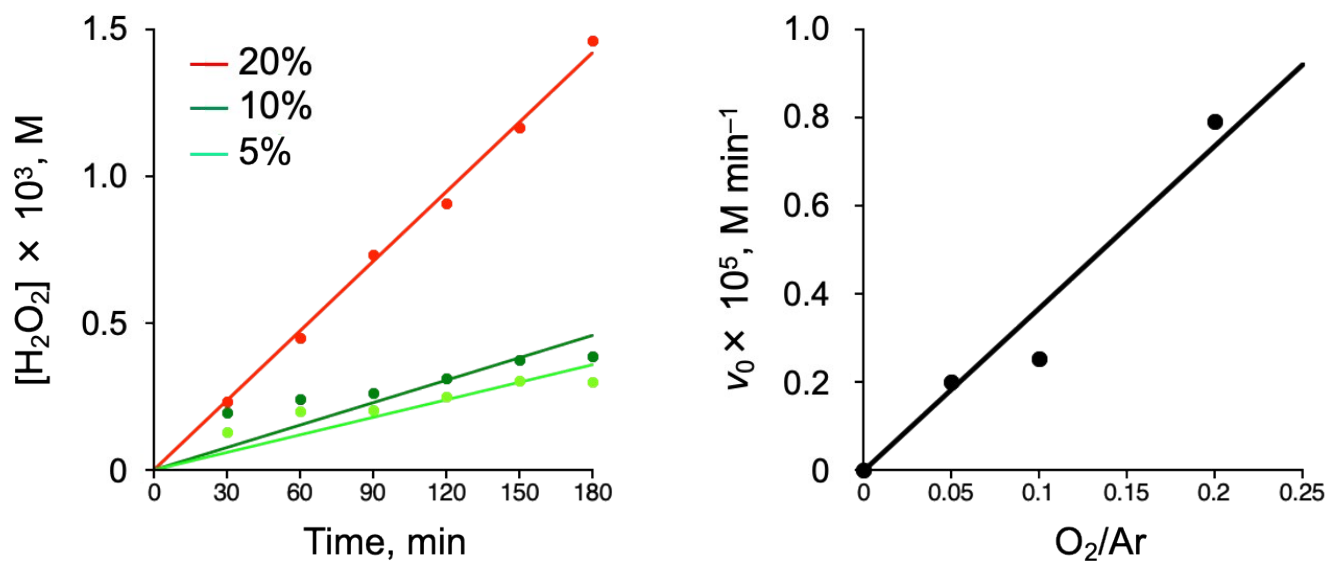

**Fig. S5** (a) Time profiles of the H<sub>2</sub>O<sub>2</sub> production by **1** at various oxygen concentrations (5, 10 and 20%). (b) Concentration dependence of oxygen on the initial rates of H<sub>2</sub>O<sub>2</sub> production. Reaction conditions: [**1**] = 0.10 mM, [HCOOH] = 0.80 M, solvent: ethylene glycol (1.0 mL), temperature: 313 K. O<sub>2</sub> concentration was adjusted by the flow rate ratio between air and Ar balance gas during the gas purging.

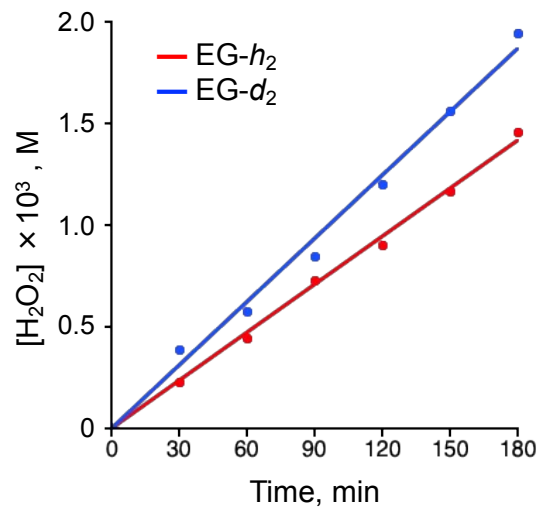

**Fig. S6** Time profiles of H<sub>2</sub>O<sub>2</sub> production by **1** in EG-*h*<sub>2</sub> (red) and EG-*d*<sub>2</sub> (blue). The kinetic isotope effect (KIE,  $\nu_0^H/\nu_0^D$ ) was determined to be 0.76.

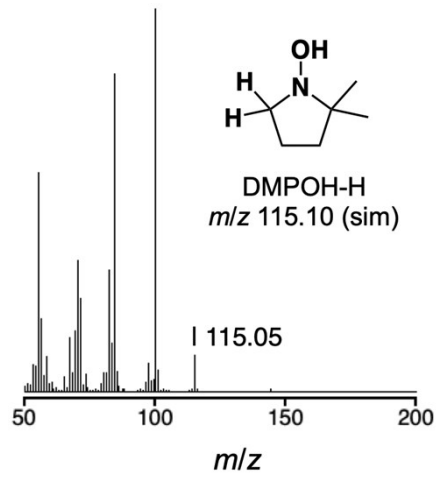

**Fig. S7** GC-MS spectrum observed from the  $\text{H}_2\text{O}_2$  production by **1** in EG in the presence of 0.80 M HCOOH and 10 mM DMPO. The reaction solution (100  $\mu\text{L}$ ) was diluted in MeCN (900  $\mu\text{L}$ ) to submit the GC-MS measurements.



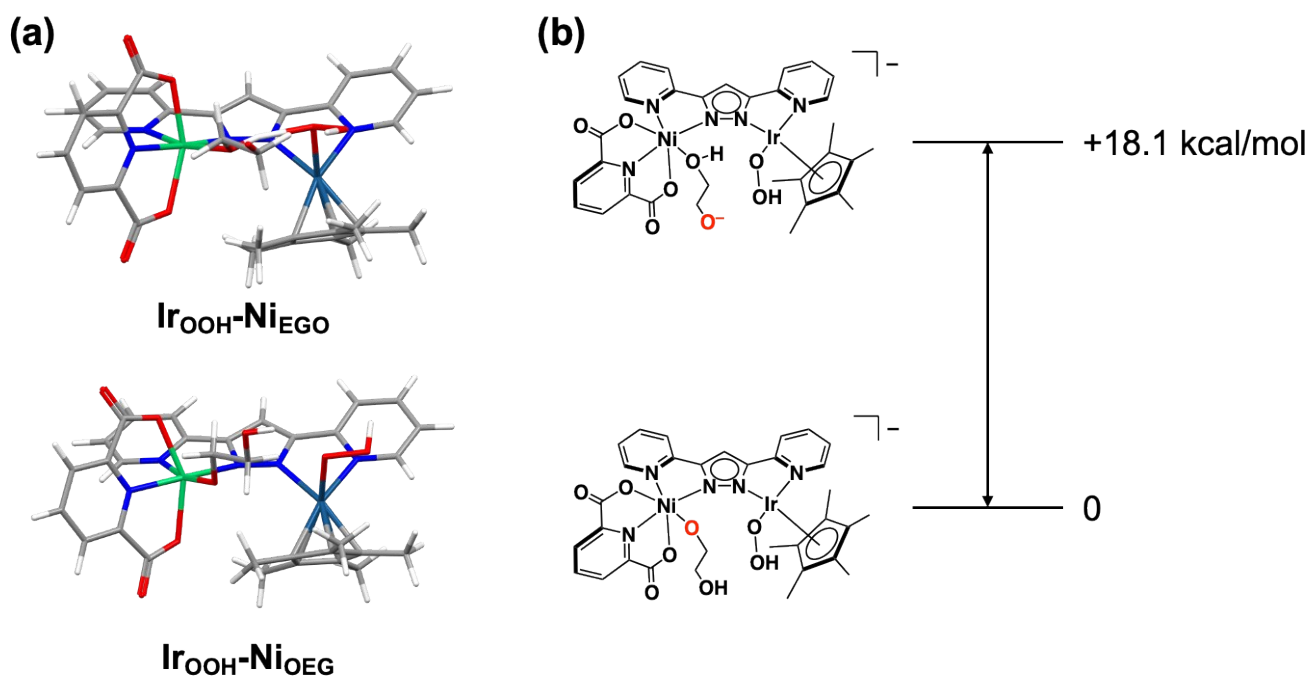

**Fig. S8.** (a) DFT-optimized structures of **Ir<sub>OOH</sub>-Ni<sub>EGO</sub>** (top) and **Ir<sub>OOH</sub>-Ni<sub>OEG</sub>** (bottom) calculated at UB3LYP/SDD (Ir, Ni), 6-311G(d,p) (others) level of theory. (b) An energy diagram of **Ir<sub>OOH</sub>-Ni<sub>EGO</sub>** and **Ir<sub>OOH</sub>-Ni<sub>OEG</sub>**.

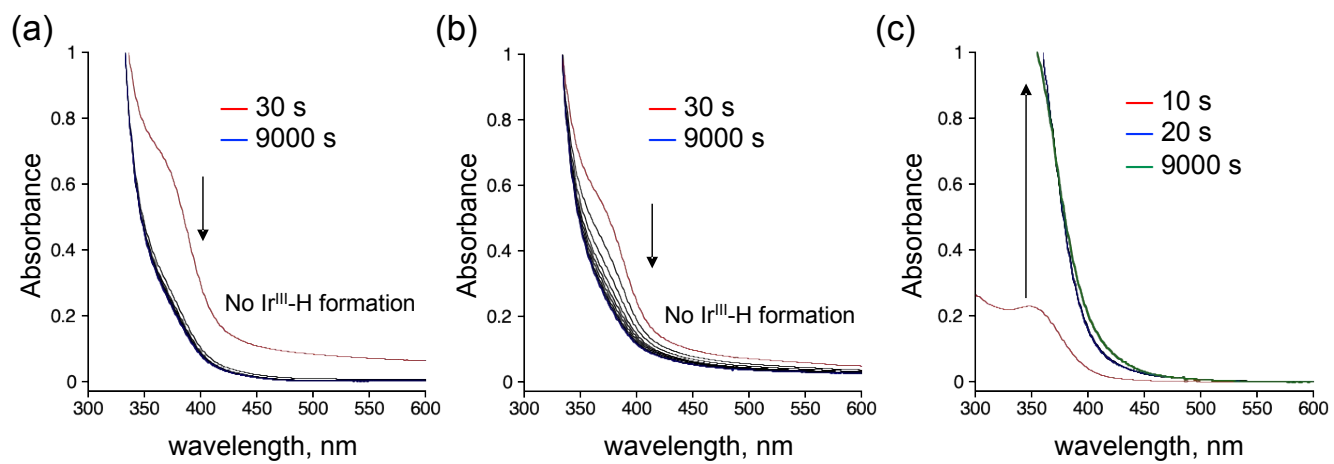

**Fig. S9** UV-Vis spectral changes of **1** in 2-propanol (a), *tert*-butanol (b) and water (c). The reaction conditions:  $[1] = 0.10$  mM,  $[HCOOH] = 0.20$  M, reaction temp.: 298 K, under air.

**Table S1 Catalytic H<sub>2</sub>O<sub>2</sub> production by 1 in EG for a prolonged time. <sup>a</sup>**

| Entry | [1], mM | H <sub>2</sub> O <sub>2</sub> |     |
|-------|---------|-------------------------------|-----|
|       |         | Concentration, mM             | TON |
| 1     | 0.1     | 6.0                           | 60  |
| 2     | 0.01    | 2.8                           | 280 |
| 3     | 0.001   | 0.52                          | 520 |

<sup>a</sup> Reaction conditions: [1] = 0.1 – 0.001 mM, [HCOOH] = 0.80 M, solvent: EG, reaction temp.: 313 K, reaction time: 86 h, under air.

**Table S2 Catalytic H<sub>2</sub>O<sub>2</sub> production by 1 in EG in the presence of different electron donors. <sup>a</sup>**

| Entry | Electron donor                          | H <sub>2</sub> O <sub>2</sub> |     |
|-------|-----------------------------------------|-------------------------------|-----|
|       |                                         | Concentration, mM             | TON |
| 1     | Sodium formate (HCOONa)                 | <0.1                          | <1  |
| 2     | Ammonium formate (HCOONH <sub>4</sub> ) | <0.1                          | <1  |
| 3     | Methyl formate (HCOOMe)                 | 0.1                           | 1   |
| 4     | L(+)-Ascorbic acid                      | 0.2                           | 2   |

<sup>a</sup> Reaction conditions: [1] = 0.10 mM, [electron donor] = 0.20 M, solvent: EG, reaction temp.: 313 K, reaction time: 15 h, under air.

**Table S3 Dielectric constants, initial rates of H<sub>2</sub> evolution, Ir-H formation rates and H<sub>2</sub>O<sub>2</sub> concentrations for the H<sub>2</sub>O<sub>2</sub> production by **1** at various protic solvents.**

| Solvent              | Dielectric constant <sup>a</sup> | H <sub>2</sub> evolution rate (μmol min <sup>-1</sup> ) <sup>b</sup> | Ir-H formation rate (s <sup>-1</sup> ) <sup>c</sup> | H <sub>2</sub> O <sub>2</sub> conc. (mM) <sup>d</sup> |
|----------------------|----------------------------------|----------------------------------------------------------------------|-----------------------------------------------------|-------------------------------------------------------|
| Water                | 78.5 <sup>S1</sup>               | 4.2 × 10 <sup>-1</sup>                                               | n. d. <sup>e</sup>                                  | 0.1                                                   |
| Methanol             | 31.5 <sup>S1</sup>               | 7.3 × 10 <sup>-4</sup>                                               | 1.2 × 10 <sup>-3</sup>                              | 3.2                                                   |
| Ethanol              | 24.3 <sup>S1</sup>               | 1.2 × 10 <sup>-2</sup>                                               | 6.0 × 10 <sup>-4</sup>                              | 2.0                                                   |
| 2-Propanol           | 18.0 <sup>S1</sup>               | 7.4 × 10 <sup>-6</sup>                                               | n. d. <sup>f</sup>                                  | 0.8                                                   |
| <i>tert</i> -Butanol | 9.9 <sup>S1</sup>                | 2.1 × 10 <sup>-5</sup>                                               | n. d. <sup>f</sup>                                  | 0.2                                                   |
| Ethylene glycol (EG) | 37.7 <sup>S1</sup>               | 5.9 × 10 <sup>-3</sup>                                               | 6.0 × 10 <sup>-3</sup>                              | 3.7                                                   |
| 1,2-Propanediol      | 28 <sup>S2</sup>                 | 5.4 × 10 <sup>-4</sup>                                               | 7.9 × 10 <sup>-4</sup>                              | 1.4                                                   |
| 1,3-Propanediol      | 34.9 <sup>S3</sup>               | 1.3 × 10 <sup>-3</sup>                                               | 1.7 × 10 <sup>-3</sup>                              | 2.5                                                   |
| Glycerol             | 40.1 <sup>S1</sup>               | 1.7 × 10 <sup>-2</sup>                                               | n. d. <sup>g</sup>                                  | 0.2                                                   |

<sup>a</sup> The dielectric constant values are determined at 298 K (ref. S1–S3). <sup>b</sup> Reaction conditions: [**1**] = 0.10 mM, [HCOOH] = 0.20 M, reaction temp.: 298 K, under Ar. <sup>c</sup> Reaction conditions: [**1**] = 0.10 mM, [HCOOH] = 0.20 M, reaction temp.: 298 K, under Ar. <sup>d</sup> Reaction conditions: [**1**] = 0.10 mM, [HCOOH] = 0.20 M, reaction temp.: 313 K, reaction time: 15 h, under air. <sup>e</sup> Too fast to be determined. <sup>f</sup> The Ir-H species was not observed probably due to the slow formation in the time scale. <sup>g</sup> It was not able to measure the absorption changes due to the high viscosity of glycerol.

#### Reference

- S1 G. Åkerlöf, *J. Am. Chem. Soc.* 1932, **54**, 4125–4139.  
 S2 Y. Kato, *YAKUGAKU ZASSHI* 1958, **78**, 565–567  
 S3 F. Wang, R. Pottel, U. Kaatz, *J. Phys. Chem. B* 1997, **101**, 922–929.

**Table S4.** Cartesian coordinates of Ir<sub>H</sub>-Ni<sub>EG</sub> at the UB3LYP/SDD(Ir, Ni), 6-311G(d,p) level of theory.

| Atom | Coordinates (Angstroms) |           |           |
|------|-------------------------|-----------|-----------|
|      | X                       | Y         | Z         |
| Ir   | -2.303000               | -0.399400 | 0.004600  |
| O    | 2.850000                | 0.926300  | -1.744700 |
| O    | 4.704900                | 0.856100  | -3.040500 |
| O    | 2.063400                | -1.016800 | 1.807900  |
| O    | 3.251100                | -2.616900 | 2.873700  |
| O    | 0.988100                | -1.358700 | -1.074700 |
| H    | 0.045800                | -1.226800 | -0.868500 |
| N    | -3.379900               | 1.183500  | -0.969100 |
| C    | -4.594400               | 1.057100  | -1.531000 |
| H    | -5.014900               | 0.061500  | -1.528700 |
| N    | -0.916600               | 1.175600  | -0.154100 |
| N    | 0.342100                | 1.312700  | 0.241100  |
| N    | 2.819000                | 2.011000  | 0.924200  |
| N    | 3.833200                | -0.788300 | -0.065100 |
| C    | -5.277200               | 2.124900  | -2.088600 |
| H    | -6.254500               | 1.966300  | -2.525300 |
| C    | -4.675300               | 3.384500  | -2.080300 |
| H    | -5.181500               | 4.241000  | -2.509400 |
| C    | -3.411000               | 3.520200  | -1.534200 |
| H    | -2.899300               | 4.473800  | -1.536300 |
| C    | -2.769900               | 2.402500  | -0.987700 |
| C    | -1.429600               | 2.398900  | -0.459500 |
| C    | -0.458700               | 3.372800  | -0.210800 |
| H    | -0.536500               | 4.438200  | -0.350500 |
| C    | 0.639500                | 2.638600  | 0.237400  |
| C    | 1.968300                | 3.032800  | 0.701500  |
| C    | 2.341100                | 4.356800  | 0.945700  |
| H    | 1.641100                | 5.161500  | 0.760400  |
| C    | 3.614400                | 4.617600  | 1.433500  |
| H    | 3.926100                | 5.637600  | 1.626900  |
| C    | 4.481100                | 3.555300  | 1.675800  |
| H    | 5.480000                | 3.715900  | 2.060300  |
| C    | 4.037400                | 2.266700  | 1.401100  |
| H    | 4.676600                | 1.406000  | 1.559800  |
| C    | -1.722000               | -2.120500 | 1.298500  |
| C    | -2.976900               | -2.412300 | 0.633800  |
| C    | -3.942100               | -1.458900 | 1.089700  |
| C    | -3.317700               | -0.613700 | 2.102000  |
| C    | -1.966200               | -1.022700 | 2.222900  |
| C    | -0.521500               | -3.019000 | 1.330300  |
| H    | -0.666900               | -3.789000 | 2.098000  |
| H    | 0.388800                | -2.472100 | 1.574100  |
| H    | -0.369900               | -3.527500 | 0.377600  |
| C    | -3.239600               | -3.593200 | -0.252400 |
| H    | -2.349300               | -3.867900 | -0.817900 |
| H    | -4.040900               | -3.395900 | -0.965600 |
| H    | -3.530700               | -4.459700 | 0.352400  |
| C    | -5.408000               | -1.473700 | 0.776100  |

|    |           |           |           |
|----|-----------|-----------|-----------|
| H  | -5.943100 | -2.048800 | 1.540400  |
| H  | -5.613400 | -1.944200 | -0.186800 |
| H  | -5.837900 | -0.470400 | 0.768200  |
| C  | -4.021100 | 0.429800  | 2.917300  |
| H  | -4.753700 | 0.983900  | 2.325800  |
| H  | -3.315700 | 1.149900  | 3.333700  |
| H  | -4.557500 | -0.027700 | 3.757200  |
| C  | -0.944100 | -0.469300 | 3.165600  |
| H  | -0.984300 | -1.029600 | 4.107500  |
| H  | -1.133300 | 0.580500  | 3.396600  |
| H  | 0.070100  | -0.568900 | 2.773900  |
| C  | 4.025800  | 0.523800  | -2.076800 |
| C  | 4.614900  | -0.519600 | -1.108600 |
| C  | 5.838900  | -1.170600 | -1.238700 |
| H  | 6.467400  | -0.942400 | -2.089700 |
| C  | 6.201000  | -2.097000 | -0.258200 |
| H  | 7.147800  | -2.621100 | -0.335600 |
| C  | 5.351900  | -2.356200 | 0.821200  |
| H  | 5.595400  | -3.069000 | 1.598400  |
| C  | 4.146700  | -1.664400 | 0.887900  |
| C  | 3.075200  | -1.802000 | 1.977500  |
| H  | -1.892100 | -0.843000 | -1.478900 |
| C  | 1.119500  | -1.530600 | -2.495900 |
| H  | 2.175600  | -1.441100 | -2.734900 |
| H  | 0.588600  | -0.740200 | -3.032600 |
| C  | 0.602200  | -2.900500 | -2.910200 |
| H  | -0.451400 | -3.006200 | -2.609000 |
| H  | 1.185600  | -3.674900 | -2.394900 |
| O  | 0.741400  | -2.984200 | -4.324300 |
| H  | 0.573400  | -3.891500 | -4.591400 |
| Ni | 2.097200  | 0.162000  | 0.073800  |

**Table S5.** Cartesian coordinates of  $\text{Ir}_{\text{OOH}}\text{-Ni}_{\text{EG}}$  at the UB3LYP/SDD(Ir, Ni), 6-311G(d,p) level of theory.

| Atom | Coordinates (Angstroms) |           |           |
|------|-------------------------|-----------|-----------|
|      | X                       | Y         | Z         |
| Ir   | -2.296800               | -0.311600 | 0.179200  |
| O    | 2.847000                | 0.896500  | -1.749900 |
| O    | 4.737900                | 0.876600  | -2.994600 |
| O    | 2.098300                | -0.903900 | 1.891900  |
| O    | 3.346800                | -2.385400 | 3.055500  |
| O    | 1.064100                | -1.391600 | -1.010700 |
| H    | 0.132100                | -1.165800 | -1.257600 |
| N    | -3.365700               | 1.190200  | -0.969500 |
| C    | -4.560400               | 1.008600  | -1.550600 |
| H    | -4.987700               | 0.019500  | -1.458300 |
| N    | -0.917100               | 1.247000  | -0.095600 |
| N    | 0.350100                | 1.391400  | 0.263500  |
| N    | 2.848100                | 2.106500  | 0.834900  |
| N    | 3.877000                | -0.693500 | 0.025200  |
| C    | -5.220100               | 2.017700  | -2.234600 |
| H    | -6.184300               | 1.821200  | -2.684700 |
| C    | -4.610700               | 3.269400  | -2.327200 |
| H    | -5.099000               | 4.082200  | -2.851900 |
| C    | -3.362200               | 3.456500  | -1.757600 |
| H    | -2.846900               | 4.404700  | -1.837900 |
| C    | -2.743300               | 2.394300  | -1.089600 |
| C    | -1.409200               | 2.433200  | -0.538000 |
| C    | -0.414400               | 3.405500  | -0.412100 |
| H    | -0.466700               | 4.448000  | -0.678400 |
| C    | 0.675100                | 2.700200  | 0.104600  |
| C    | 2.017700                | 3.115900  | 0.507700  |
| C    | 2.418000                | 4.450700  | 0.597200  |
| H    | 1.732700                | 5.243800  | 0.326500  |
| C    | 3.701400                | 4.738400  | 1.042400  |
| H    | 4.036400                | 5.766700  | 1.115000  |
| C    | 4.547300                | 3.691800  | 1.397500  |
| H    | 5.553300                | 3.873000  | 1.753600  |
| C    | 4.074900                | 2.389700  | 1.272400  |
| H    | 4.700000                | 1.540100  | 1.521700  |
| C    | -1.743500               | -1.984500 | 1.514600  |
| C    | -3.047500               | -2.273300 | 0.934600  |
| C    | -3.949400               | -1.245100 | 1.337400  |
| C    | -3.227300               | -0.301100 | 2.181200  |
| C    | -1.881900               | -0.791000 | 2.314700  |
| C    | -0.558900               | -2.898000 | 1.485400  |
| H    | -0.662300               | -3.652300 | 2.275100  |
| H    | 0.371500                | -2.355900 | 1.652100  |
| H    | -0.483600               | -3.417600 | 0.530100  |
| C    | -3.374400               | -3.500500 | 0.143300  |
| H    | -2.609100               | -3.700000 | -0.605000 |
| H    | -4.328700               | -3.407900 | -0.375500 |

|    |           |           |           |
|----|-----------|-----------|-----------|
| H  | -3.436100 | -4.362700 | 0.816800  |
| C  | -5.421200 | -1.198800 | 1.062700  |
| H  | -5.963500 | -1.671700 | 1.889000  |
| H  | -5.682300 | -1.736700 | 0.150300  |
| H  | -5.789100 | -0.175000 | 0.977600  |
| C  | -3.831800 | 0.848600  | 2.930000  |
| H  | -4.633200 | 1.324500  | 2.361600  |
| H  | -3.084100 | 1.610100  | 3.153400  |
| H  | -4.255500 | 0.509900  | 3.882500  |
| C  | -0.812900 | -0.195700 | 3.173300  |
| H  | -0.911500 | -0.608100 | 4.184900  |
| H  | -0.912600 | 0.888300  | 3.246300  |
| H  | 0.190200  | -0.434300 | 2.814400  |
| C  | 4.049200  | 0.544300  | -2.037300 |
| C  | 4.669600  | -0.422800 | -1.010300 |
| C  | 5.934400  | -1.000900 | -1.078900 |
| H  | 6.570000  | -0.772800 | -1.924600 |
| C  | 6.326500  | -1.856300 | -0.046900 |
| H  | 7.305000  | -2.324100 | -0.077400 |
| C  | 5.468600  | -2.114100 | 1.025700  |
| H  | 5.736400  | -2.769200 | 1.844500  |
| C  | 4.221700  | -1.496500 | 1.030700  |
| C  | 3.142400  | -1.631000 | 2.113400  |
| C  | 1.668000  | -2.015100 | -2.152000 |
| H  | 2.727700  | -2.139800 | -1.939200 |
| H  | 1.573000  | -1.377800 | -3.034800 |
| C  | 1.046900  | -3.381100 | -2.409100 |
| H  | -0.027000 | -3.269200 | -2.605300 |
| H  | 1.175700  | -4.006400 | -1.514400 |
| O  | 1.728800  | -3.936400 | -3.533800 |
| H  | 1.364600  | -4.809300 | -3.700900 |
| Ni | 2.095700  | 0.184400  | 0.095000  |
| O  | -1.479100 | -0.802200 | -1.691100 |
| O  | -2.175200 | -1.929900 | -2.311900 |
| H  | -2.285300 | -1.578200 | -3.205000 |



**Table S6.** Cartesian coordinates of Ir<sub>OOH</sub>-Ni<sub>EGO</sub> at the UB3LYP/SDD(Ir, Ni), 6-311G(d,p) level of theory.

| Atom | Coordinates (Angstroms) |           |           |
|------|-------------------------|-----------|-----------|
|      | X                       | Y         | Z         |
| Ir   | 2.264000                | -0.304200 | -0.146800 |
| O    | -2.820200               | 0.879900  | 1.851700  |
| O    | -4.658100               | 0.763100  | 3.169700  |
| O    | -2.216200               | -0.766800 | -1.921000 |
| O    | -3.568100               | -2.122000 | -3.125800 |
| O    | -1.008200               | -1.383800 | 0.948600  |
| H    | -0.172400               | -1.081800 | 1.364400  |
| N    | 3.379400                | 1.251000  | 0.859800  |
| C    | 4.584400                | 1.093100  | 1.431800  |
| H    | 4.989400                | 0.090800  | 1.414000  |
| N    | 0.895000                | 1.276700  | 0.084600  |
| N    | -0.385300               | 1.412200  | -0.234200 |
| N    | -2.904400               | 2.126500  | -0.735000 |
| N    | -3.878000               | -0.694000 | 0.071100  |
| C    | 5.275200                | 2.135000  | 2.025000  |
| H    | 6.244100                | 1.949800  | 2.470700  |
| C    | 4.686700                | 3.407000  | 2.048100  |
| H    | 5.199100                | 4.246300  | 2.503500  |
| C    | 3.419700                | 3.566100  | 1.508000  |
| H    | 2.911500                | 4.521500  | 1.547700  |
| C    | 2.767800                | 2.472700  | 0.932200  |
| C    | 1.413200                | 2.483500  | 0.438900  |
| C    | 0.418200                | 3.454700  | 0.297900  |
| H    | 0.487900                | 4.510000  | 0.504000  |
| C    | -0.695900               | 2.729900  | -0.131500 |
| C    | -2.050600               | 3.138000  | -0.486700 |
| C    | -2.449000               | 4.474100  | -0.605400 |
| H    | -1.744300               | 5.269800  | -0.398900 |
| C    | -3.750600               | 4.755600  | -0.994300 |
| H    | -4.081900               | 5.784100  | -1.088400 |
| C    | -4.622200               | 3.703700  | -1.265000 |
| H    | -5.645000               | 3.879400  | -1.573600 |
| C    | -4.149900               | 2.403800  | -1.116800 |
| H    | -4.791300               | 1.549600  | -1.301900 |
| C    | 1.616000                | -1.957200 | -1.507600 |
| C    | 2.830500                | -2.363700 | -0.836900 |
| C    | 3.864500                | -1.437700 | -1.172500 |
| C    | 3.310400                | -0.448600 | -2.095300 |
| C    | 1.933500                | -0.781100 | -2.295400 |
| C    | 0.358800                | -2.759600 | -1.608400 |
| H    | 0.490100                | -3.535900 | -2.373900 |
| H    | -0.493700               | -2.141700 | -1.886500 |
| H    | 0.115800                | -3.245700 | -0.664300 |
| C    | 2.985900                | -3.576000 | 0.025900  |
| H    | 2.015300                | -3.960300 | 0.338900  |
| H    | 3.551100                | -3.345300 | 0.929200  |
| H    | 3.504900                | -4.365900 | -0.530100 |

|    |           |           |           |
|----|-----------|-----------|-----------|
| C  | 5.309200  | -1.568700 | -0.796100 |
| H  | 5.838100  | -2.174400 | -1.542000 |
| H  | 5.425100  | -2.063000 | 0.170200  |
| H  | 5.809300  | -0.599400 | -0.750300 |
| C  | 4.088300  | 0.621800  | -2.800800 |
| H  | 4.854900  | 1.054800  | -2.154500 |
| H  | 3.435400  | 1.431600  | -3.129600 |
| H  | 4.590900  | 0.218700  | -3.688900 |
| C  | 0.965600  | -0.087300 | -3.203200 |
| H  | 0.994300  | -0.560800 | -4.192000 |
| H  | 1.215600  | 0.967700  | -3.329300 |
| H  | -0.058500 | -0.165300 | -2.833400 |
| C  | -3.986800 | 0.468400  | 2.183800  |
| C  | -4.614600 | -0.499400 | 1.162700  |
| C  | -5.854200 | -1.123000 | 1.278700  |
| H  | -6.439200 | -0.957600 | 2.174000  |
| C  | -6.284800 | -1.938100 | 0.230900  |
| H  | -7.241500 | -2.446300 | 0.300300  |
| C  | -5.493900 | -2.101600 | -0.909200 |
| H  | -5.794700 | -2.714800 | -1.748700 |
| C  | -4.267700 | -1.446000 | -0.957100 |
| C  | -3.273400 | -1.469800 | -2.128300 |
| C  | -1.627000 | -2.382800 | 1.813300  |
| H  | -2.480600 | -2.779000 | 1.264000  |
| H  | -1.988500 | -1.906200 | 2.728900  |
| C  | -0.720400 | -3.584600 | 2.190600  |
| H  | 0.203100  | -3.134500 | 2.718200  |
| H  | -0.282200 | -3.973900 | 1.219100  |
| O  | -1.354900 | -4.486300 | 2.907900  |
| Ni | -2.093800 | 0.185700  | -0.022100 |
| O  | 1.590400  | -0.638700 | 1.794100  |
| O  | 2.329900  | -1.700600 | 2.449200  |
| H  | 1.614800  | -2.354700 | 2.599700  |

**Table S7.** Cartesian coordinates of Ir<sub>OOH</sub>-Ni<sub>OEG</sub> at the UB3LYP/SDD(Ir, Ni), 6-311G(d,p) level of theory.

| Atom | Coordinates (Angstroms) |           |           |
|------|-------------------------|-----------|-----------|
|      | X                       | Y         | Z         |
| Ir   | 2.343900                | -0.356500 | -0.144900 |
| O    | -3.322100               | 0.929000  | 1.785300  |
| O    | -5.308500               | 0.760400  | 2.863000  |
| O    | -2.250000               | -0.802200 | -1.920900 |
| O    | -3.367300               | -2.357900 | -3.122700 |
| O    | -1.396300               | -1.369200 | 0.974400  |
| N    | 3.521400                | 1.331300  | 0.487700  |
| C    | 4.827600                | 1.269500  | 0.790000  |
| H    | 5.291300                | 0.300900  | 0.679300  |
| N    | 0.920400                | 1.204900  | 0.120900  |
| N    | -0.370000               | 1.324400  | -0.147200 |
| N    | -2.893800               | 2.082100  | -0.750800 |
| N    | -4.095000               | -0.734300 | -0.081000 |
| C    | 5.545600                | 2.368000  | 1.235200  |
| H    | 6.600500                | 2.266900  | 1.456200  |
| C    | 4.874700                | 3.583100  | 1.398200  |
| H    | 5.403300                | 4.461700  | 1.750900  |
| C    | 3.521700                | 3.647300  | 1.122000  |
| H    | 2.961800                | 4.562300  | 1.265400  |
| C    | 2.850600                | 2.500800  | 0.668800  |
| C    | 1.448500                | 2.438000  | 0.374000  |
| C    | 0.445600                | 3.398700  | 0.239400  |
| H    | 0.528200                | 4.466000  | 0.363500  |
| C    | -0.679400               | 2.648700  | -0.103900 |
| C    | -2.026800               | 3.071800  | -0.477600 |
| C    | -2.395800               | 4.418200  | -0.592300 |
| H    | -1.682300               | 5.198700  | -0.359400 |
| C    | -3.681300               | 4.731500  | -1.007600 |
| H    | -3.989400               | 5.767700  | -1.097900 |
| C    | -4.567500               | 3.699400  | -1.306000 |
| H    | -5.580500               | 3.898000  | -1.633400 |
| C    | -4.125200               | 2.389800  | -1.154700 |
| H    | -4.780700               | 1.549500  | -1.351500 |
| C    | 1.452400                | -2.129600 | -1.240100 |
| C    | 2.682800                | -2.504200 | -0.598200 |
| C    | 3.751900                | -1.709300 | -1.132800 |
| C    | 3.172300                | -0.826300 | -2.147300 |
| C    | 1.769200                | -1.080100 | -2.197500 |
| C    | 0.143200                | -2.835000 | -1.097900 |
| H    | -0.458800               | -2.716000 | -1.998900 |
| H    | -0.453300               | -2.429600 | -0.260500 |
| H    | 0.316400                | -3.902900 | -0.930200 |
| C    | 2.808300                | -3.562200 | 0.452500  |
| H    | 1.879500                | -3.650600 | 1.014800  |
| H    | 3.604500                | -3.328200 | 1.159500  |
| H    | 3.023400                | -4.530600 | -0.015900 |
| C    | 5.212700                | -1.916100 | -0.865400 |

|    |           |           |           |
|----|-----------|-----------|-----------|
| H  | 5.605000  | -2.735000 | -1.480700 |
| H  | 5.388600  | -2.171500 | 0.181300  |
| H  | 5.798800  | -1.025800 | -1.104500 |
| C  | 3.945200  | 0.089400  | -3.047800 |
| H  | 4.782700  | 0.559900  | -2.527200 |
| H  | 3.308200  | 0.881700  | -3.442900 |
| H  | 4.356000  | -0.465600 | -3.900200 |
| C  | 0.776400  | -0.460300 | -3.130300 |
| H  | 0.751500  | -1.036000 | -4.064200 |
| H  | 1.044400  | 0.568900  | -3.378900 |
| H  | -0.235100 | -0.476200 | -2.716000 |
| C  | -4.496600 | 0.473600  | 1.979800  |
| C  | -4.949300 | -0.556300 | 0.924800  |
| C  | -6.155200 | -1.254700 | 0.944900  |
| H  | -6.835800 | -1.087300 | 1.769700  |
| C  | -6.428000 | -2.137800 | -0.099900 |
| H  | -7.356800 | -2.700900 | -0.105200 |
| C  | -5.510300 | -2.299600 | -1.140200 |
| H  | -5.677100 | -2.969500 | -1.973900 |
| C  | -4.329300 | -1.564200 | -1.097600 |
| C  | -3.220500 | -1.599000 | -2.161600 |
| C  | -1.640300 | -1.649500 | 2.314800  |
| H  | -2.627200 | -2.126600 | 2.484100  |
| H  | -1.628000 | -0.750000 | 2.950600  |
| C  | -0.567000 | -2.603800 | 2.835200  |
| H  | 0.407100  | -2.112000 | 2.743900  |
| H  | -0.562600 | -3.513200 | 2.213700  |
| O  | -0.845400 | -2.951900 | 4.208600  |
| H  | -0.006500 | -3.193200 | 4.606800  |
| Ni | -2.272600 | 0.103700  | 0.042300  |
| O  | 3.548700  | -0.955500 | 2.436500  |
| H  | 3.595000  | -0.271400 | 3.115500  |
| O  | 2.198700  | -0.682900 | 1.909000  |
